# 1 Firing patterns of ventral hippocampal neurons predict the 2 exploration of anxiogenic locations

3

4 *Hugo Malagon-Vina*<sup>1\*</sup>, *Stéphane Ciocchi*<sup>1,2,3\*</sup>, *Thomas Klausberger*<sup>1,3\*</sup>

5 <sup>1</sup>Division of Cognitive Neurobiology, Center for Brain Research, Medical University of Vienna, 1090  
6 Vienna.

7 <sup>2</sup>Laboratory of Systems Neuroscience, Department of Physiology, University of Bern, 3012 Bern,  
8 Switzerland.

9 <sup>3</sup>Contributed equally.

10 \*Corresponding author.

11

12

## 13 **Summary**

14 **The ventral hippocampus (vH) plays a crucial role in anxiety-related behaviour and vH**  
15 **neurons increase their firing when animals explore anxiogenic environments. However, if**  
16 **and how such neuronal activity induces or restricts the exploration of an anxiogenic location**  
17 **remains unexplained. Here, we developed a novel behavioural paradigm to motivate rats to**  
18 **explore an anxiogenic area. Rats ran along an elevated linear maze with protective**  
19 **sidewalls, which were subsequently removed in parts of the track to introduce an anxiogenic**  
20 **location. We recorded neuronal action potentials during task performance and found that**  
21 **vH neurons exhibited remapping of activity, overrepresenting anxiogenic locations.**  
22 **Direction-dependent firing was homogenised by the anxiogenic experience. We further**  
23 **showed that the activity of vH neurons predicted the extent of exploration of the anxiogenic**  
24 **location. Our data suggest that anxiety-related firing does not solely depend on the**  
25 **exploration of anxiogenic environments, but also on intentions to explore them.**

26

## 27 Introduction

28 In the *Epistulae Morales ad Lucilium*, Seneca wrote: “There are more things, Lucilius, likely to frighten  
29 us than there are to crush us; we suffer more often in imagination than in reality”. This sentence, from  
30 one of the key figures of the school of stoicism, describes inner fear within our imagination in the  
31 absence of a direct fear-provoking stimulus. Nowadays, even though anxiety and fear correspond to  
32 the same theoretical construct in some literature, anxiety differentiates from the latter based on the  
33 potential nature of the threat in the absence of an imminent harmful stimulus(Calhoon and Tye, 2015,  
34 Davis et al., 2010, Steimer, 2002). Anxiety disorders are becoming more commonly reported: 12-month  
35 prevalence estimates on mental disorders show that at least 14% of people in the European Union  
36 suffer from anxiety disorders(Wittchen et al., 2011), and around 31% of people in the United States  
37 have experienced some type of anxiety disorders in their lifetime(Kessler et al., 1994). Different brain  
38 areas play a role in the underlying circuitry of anxiety(Sandford et al., 2000). Stimulations in the  
39 brainstem, more precisely in the periaqueductal grey matter (PAG) or the locus coeruleus are specifically  
40 involved in the symptomatology of anxiety(Graeff et al., 1993, Redmond and Huang, 1979). Some  
41 studies have also shown how the amygdala plays a role in humans suffering from anxiety  
42 disorders(Davidson et al., 1999, Birbaumer et al., 1998) or in animal models with generalised fear  
43 responses associated with anxiety(Tovote et al., 2015, Wolff et al., 2014, Grundemann et al., 2019).  
44 Also, by using the elevated plus maze (EPM) as an anxiety task(Pellow et al., 1985), Tye and colleagues  
45 induced anxiolytic effects by targeting projections from the basolateral amygdala (BA) to the central  
46 nucleus of the amygdala(Tye et al., 2011). Additional structures are involved in anxiety and include the  
47 bed nucleus of the stria terminalis, whose subdivisions are differentially involved in anxiety  
48 responses(Duvarci et al., 2009, Kim et al., 2013), and the medial prefrontal cortex (mPFC), which has  
49 also been directly linked to anxiety processing in both humans(Rauch et al., 1997) and rodents(Park et  
50 al., 2016, Shah and Treit, 2003).

51 Last but not least, the ventral hippocampus (vH) plays a critical role in anxiety behaviour.  
52 Lesions in the vH induce anxiolysis during the exploration of elevated open arenas (e.g. EPM)(Kjelstrup  
53 et al., 2002, Padilla-Coreano et al., 2016, Jimenez et al., 2018), or generally in tasks associated with  
54 approach-avoidance conflicts(Schumacher et al., 2018). Neurons recorded in the vH showed increased  
55 firing in locations with elevated anxiety(Jimenez et al., 2018, Ciochi et al., 2015). Likewise, projections  
56 neurons from- and to the vH exhibit anxiety-related activity: amygdala projections to the vH are  
57 specifically shaping anxiety-related behaviour during the exploration of an EPM(Felix-Ortiz and Tye,  
58 2014, Pi et al., 2020). Similarly, the reciprocal connection (from vH to BA) is involved in the expression  
59 of context-dependent fear memories(Kim and Cho, 2020). Furthermore, information related to anxiety  
60 in the vH is directly routed to the mPFC(Ciochi et al., 2015), and synchronised activity in this

61 monosynaptically connected long-range circuit(Adhikari et al., 2011, Adhikari et al., 2010) is essential  
62 for the expression of anxiety behaviour. Motivated by the critical role of the dorsal hippocampus region  
63 (dH) in the encoding of spatial information(O'Keefe, 1976, Okeefe and Nadel, 1979), several studies  
64 focusing on the vH have described its involvement in spatial coding (Poucet et al., 1994, Jung et al.,  
65 1994). Yet, probably due to its anatomical location and the difficulties to record action potentials of  
66 single-unit activity in the vH, the individual neuronal dynamics associated with the changes between  
67 anxiogenic and non-anxiogenic states during spatial navigation remain poorly understood.

68 To study the neuronal dynamics associated with anxiety behaviour in the vH, we  
69 simultaneously recorded the activity of individual neurons during the exploration of the EPM, as well  
70 as during the exploration of a novel behavioural paradigm, the elevated linear maze (ELM). During the  
71 same recording session, we modified the ELM from a non-anxiogenic to an anxiogenic configuration,  
72 while recording the activity of the same individual vH neurons. This enabled the investigation of the  
73 neuronal dynamics within the vH underlying different anxiety states. We specifically examined the  
74 remapping of neuronal activity at the single neuron- and population-level as animals transitioned from  
75 a non-anxiogenic configuration to an anxiogenic one. Collectively, the results of this study show that  
76 the neuronal activity in the vH does not simply reflect anxiogenic locations but that it is dynamically  
77 modulated by the experience and expectation of anxiety during spatial navigation.

78

## 79 **Results**

80

### 81 **The firing activity of ventral hippocampal neurons is dynamically modulated during EPM exploration.**

82 Rats ( $n = 6$ ) freely explored an EPM consisting of two opposite arms with protective side-walls (closed  
83 arms) and two opposite arms without sidewalls (open arms) (Figure 1A). The rats exhibited strong  
84 anxiety-related behaviour by spending most of the time in the closed arms, avoiding the more  
85 anxiogenic open arms and the centre (Figure 1A, bottom. Closed vs open,  $p = 9.5615e-10$ ; closed vs  
86 centre,  $p = 9.5657e-10$ . One-way ANOVA, Tukey-Kramer for multiple comparisons). While rats explored  
87 the EPM, we recorded neuronal activity in the vH with tetrodes (Figure 1B) and isolated individual  
88 spikes from different single neurons ( $n = 98$ ). We identified vH neurons with previously described  
89 activity patterns(Ciocchi et al., 2015), exhibiting preferential firing in the open arms, closed arms, or  
90 centre of the EPM (Figure 1C). To understand the effect of the open areas on the neuronal activity, we  
91 defined six possible trajectories taken by animals during EPM exploration (from one closed arm to any  
92 other arm). After linearizing the trajectories (see methods), we organised the activity of the recorded  
93 neurons based on the spatial location of their peak (i.e. maximal) firing activity (Figure 1D). We  
94 observed that the peak firing activities of individual neurons spanned the entire maze even though the  
95 exploration of open arms was minimal. When plotting the peak firing density across the maze

96 (normalised by the total number of neurons possibly firing in a spatial bin) the activity of vH neurons  
97 was concentrated around the centre of the maze when shuttling from one closed arm to the other one  
98 (Figure 1E top,  $p(\text{C2-C1}) = 0.0038$ ,  $p(\text{C1-C2}) = 0.0352$ ; bootstrapping). In some trajectories, a similar  
99 effect is observed when animals shuttled from one closed arm to an open one (Figure 1E bottom,  $p(\text{C1-}$   
100  $\text{O2}) = 0.67$ ,  $p(\text{C1-O1}) = 0.0108$ ,  $p(\text{C2-O1}) = 0.79$ ,  $p(\text{C2-O2}) = 0.1654$ ; bootstrapping). Even though the  
101 reduced number of entries to the open arms and exploration of open areas prevents a powerful  
102 statistic calculation, the observed effects imply that open areas are relevant for the neuronal activity  
103 of the vH.

104 However, these results suffer from important limitations: First, the extremely low and sporadic  
105 exploration of the open arms does not provide robust data sampling to test hypotheses regarding the  
106 neuronal computations associated with the exploration of an anxiogenic location. Second, the non-  
107 anxiogenic and the anxiogenic areas of the EPM are constantly present. This means that the  
108 characterization of the anxiety states experienced by animals is not trivial as these may feel  
109 continuously anxious not solely in open spaces but also when considering to visit an open arm, while  
110 being in the closed arms of the EPM. In order to discriminate between neuronal activity related to  
111 spatial exploration from anxiety-related exploration and to motivate the exploration of anxiogenic  
112 areas for quantitative evaluation of the associated neuronal activity, we developed a novel behavioural  
113 paradigm to better control the transitions between anxiety states and the extent of exploration of  
114 anxiogenic areas.

115

### 116 **Removal of protective sidewalls along an ELM induces anxiety behaviour**

117 We developed an ELM, which consisted of an elevated linear track with removable protective  
118 sidewalls. This allowed to have sidewalls either all along the entire ELM, called closed-closed  
119 configuration (CC), or to have the sidewalls removed from half of the track, called closed-open (CO)  
120 configuration (Figure 2A). The rapid removal of the sidewalls enabled the alternation between a non-  
121 anxiogenic and an anxiogenic configuration within the same maze and in a single recording session. To  
122 control for neuronal activity-associated differences between two dissimilar areas in the linear maze  
123 exploration, while maintaining non-anxiogenic locations, we modified temporarily the visual  
124 appearance of sidewalls and floor texture in one half of the track, creating a new and enriched  
125 environment, without being anxiogenic. This configuration was termed closed-texture (CT)  
126 configuration (Figure 2B). Rats ( $n = 6$ ) were motivated to fully explore the ELM, by shuttling from one  
127 end of the track to the other one over numerous trials, to receive food rewards (Figure 2C). To assess  
128 whether the removal of sidewalls induces behavioural readouts of anxiety similar to those of the EPM,  
129 we calculated the percentage of time spent on each of the arms for each configuration (Figure 2D). No  
130 differences were observed in the time spent by rats on the different arms during non-anxiogenic

131 explorations (CC, CT). On the contrary, a significant difference was found in the configuration with  
132 sidewalls removed (CO exploration,  $p = 1.45e-05$ , Wilcoxon signed-rank). The time spent in the centre  
133 area (11.5 cm around the middle of the track) was also longer during CO exploration compared to CC  
134 or CT explorations (Figure 2E,  $p = 2e-05$  and  $p = 0.034$  against CC and CT respectively, one-way ANOVA,  
135 Turkey-Kramer for multiple comparisons), suggesting of hesitations to enter this open area of the  
136 maze.

137 Overall, the removal of sidewalls along the ELM induced anxiety behaviour that evolved during  
138 single behavioural sessions according to the anxiety content of each maze configuration.

139

#### 140 **Overrepresentation and remapping of vH activity during anxiety**

141 We recorded a total of 133 neurons with tetrodes in the vH (Figure 1B), while the rats were exposed  
142 to the different configurations of the ELM. When the activity of individual neurons was sorted  
143 according to the spatial location of their peak firing activity, we observed that it spanned over the  
144 entire extent of the ELM for the three different configurations (Figure 3A). However, during the CO  
145 exploration, the entire distribution of peak firing activity was skewed toward the open area. We  
146 assessed the proportion of vH neurons with peak firing activity located on the different halves of the  
147 ELM during CC exploration. We found no differences in the proportion of peak firing activity located in  
148 each half of the CC configuration, even for the closed half that was going to be opened in the CO  
149 configuration (Figure 3B, left). Then, when one half was opened, a remapping of the neuronal activity  
150 was induced towards the anxiogenic location. We observed a higher proportion of peak firing activities  
151 located on the open arm (Figure 3B left,  $p = 0.0121$ , chi-square test). In a subsequent analysis, we  
152 detected that a significant proportion of vH neurons changed the location of their peak firing activities  
153 from the closed area to the open area after sidewall removal (Figure 3B right,  $p = 0.0066$ , chi-square  
154 test). Figure 3D shows the peak activity transition of every single recorded neuron before (CC) and  
155 after (CO) removing the sidewalls in half of the maze. Importantly, no differences were found for the  
156 location and location changes of peak firing activity during the exploration of the CT configuration using  
157 a novel texture and visual cues in the closed arm (Figure 3C), suggesting that dynamic remapping of vH  
158 activity is contingent to the experience of anxiety rather than to a stimulus-enriched environment or  
159 novelty.

160 Movement changes, mostly related to the running speed of the animal, could have been  
161 responsible for the neuronal activity changes observed during the exploration of the open arm. Speed  
162 related modulation of hippocampal activity has been widely shown in the dorsal hippocampal  
163 region (Wiener et al., 1989, McNaughton et al., 1983, Czurko et al., 1999). Using generalized linear  
164 models (GLMs), we aimed to capture the influence of the animal's instantaneous speed on the location  
165 dependent activity for each cell (see methods). We found that the spiking activity of 49 neurons out of

166 133 (36.84%) was significantly modulated by the speed of the animal during the exploration of the CC  
167 configuration. Also, as expected, a higher number of neurons (72 out of 133, 54.14%) were significantly  
168 modulated by running speed during the exploration of the CO, in agreement with the speed changes  
169 related to the experience of an anxiogenic area. Next, we used the residuals of the GLM model as an  
170 approximation of the neuronal spike-associated activity, corrected by the influence of the speed.  
171 Repeating the same analysis as in Figure 3B,C we found that a significant proportion of vH neurons  
172 changed the location of their peak firing activities from the closed area to the open area after sidewall  
173 removal (Figure 3F), in addition to no significant differences when exploring the CT configuration  
174 (Figure 3G). These results suggest that even though there is a modulation by the speed of the animal,  
175 there is also a prominent influence of the anxiogenic location in the neuronal activity irrespective of  
176 running speed.

177 Additionally, we observed (Figure 3A) that the activity of vH neurons appeared to be spatially  
178 broader during CO exploration, suggesting that the anxiogenic area in the CO configuration selectively  
179 affect the spatial features of vH neurons. To validate the spatial broadening of the neuronal activity in  
180 the CO configuration, we used a coverage index (also known in the literature as sparsity index (Skaggs  
181 et al., 1996), see methods). The index measures the spatial coverage of the activity of a neuron. Values  
182 close to 1 indicate that the activity of the neuron covers almost the entire linear maze (e.g. a value of  
183 0.9 implies a coverage of 90% of the space). On the contrary, values close to zero imply that the activity  
184 of the neuron is spatially selective. We compared the change of this index during changes in ELM  
185 configuration (CC to CO and to CT). We observed an increased coverage of neuronal activity from the  
186 CC to the CO configuration (Figure 3E top,  $n = 81$ ,  $p = 6.865e-05$ , Wilcoxon signed-rank) in neurons with  
187 their main activity located in the open area. In contrast, the coverage did not change significantly  
188 during the transition between the CC and the CT configuration (Figure 3E bottom,  $n = 38$ ,  $p = 0.4237$ ,  
189 Wilcoxon signed-rank) in neurons with their main activity located in the new texture area.

190 Collectively, these data indicate a dynamical recruitment of vH neurons when swapping  
191 between a non-anxiogenic (CC) to an anxiogenic configuration (CO), generating not solely a remapping  
192 of activity but also an overrepresentation of the anxiogenic area. As these effects were not detected  
193 during a novel, but non-anxiogenic experience, we concluded that they could be attributed to the  
194 processing of anxiety during open arm exploration rather than to a changed environment or novelty  
195 perception *per se*.

196

### 197 **The direction-dependent activity of vH neurons becomes homogenised following the introduction** 198 **of an anxiogenic location**

199 Hippocampal place cells have been reported to exhibit direction-specific spatial modulation of activity  
200 as animals run along a linear maze (McNaughton et al., 1983, Muller et al., 1994, Royer et al., 2010).

201 This raises the question as to whether the activity of vH neurons, recruited by areas with increased  
202 anxiety content, are also modulated by the direction of the journey along a linear track. When  
203 monitoring the activity of individual vH neurons recorded during the exploration of the CC  
204 configuration (Figure 4A), we expectedly observed a profound direction-dependent difference.  
205 However, this direction-dependent neuronal firing of the same vH neurons became homogenised,  
206 meaning that it was very similar in both directions, once the sidewalls were removed and the rats were  
207 exploring the CO configuration. To quantify this phenomenon, we use the spearman correlation as a  
208 measurement of place field similarity (PFS) of a neuron between its activity while the animal moved in  
209 one direction vs. the other direction. The PFS value obtained from the correlation will grant an accurate  
210 approximation of the similarity between the neuronal activity of both directions. As expected, the PFS  
211 index of animals exploring the CC configuration was different from the PFS index of animals exploring  
212 the CO configuration (Figure 4B, left,  $p = 1.536e-08$ , two-sample Kolmogorov-Smirnov test). Based on  
213 the values of the PFS indices (median  $PFS_{CC} = -0.0539$ , median  $PFS_{CO} = 0.5091$ ), we inferred that the  
214 significant difference between the PFS distributions is due to a similar neuronal activity in both  
215 directions during the exploration of the CO configuration.

216 To corroborate that such a phenomenon was not due to the novelty of the arm, we calculated  
217 the PFS indexes of the neuronal activity during the exploration of a novel arm (CT), instead of an  
218 anxiogenic location (i.e. CO configuration). The PFS indexes between the exploration of the CC  
219 configuration, prior to the CT (called CC2) and the PFS indexes during the CT configuration were not  
220 significantly different (Figure 4B, right,  $p = 0.0678$ , median  $PFS_{CC2} = -0.1279$ , median  $PFS_{CT} = 0.0922$ ). In  
221 general, all the PFS values during the exploration of CC, CC2 and CT were significantly lower than during  
222 the exploration of the CO configuration, as seen in the cumulative distribution plots of the PFS (Figure  
223 4C, CO vs CC,  $p = 1.536e-08$ ; vs CT,  $p = 8.1919e-07$  and vs CC2,  $p = 3.8183e-06$ ; two-sample Kolmogorov-  
224 Smirnov test). The same tendencies were seen after obtaining the neuronal spike-associated activity  
225 controlled by the speed of the animal (Figure 4D,E), as described previously and in the methods.

226 In conclusion, even though there was direction-dependent neuronal activity in the vH during  
227 the exploration of a non-anxiogenic linear maze, this spatial dependency was reduced when animals  
228 encountered an anxiogenic location, and the spiking activity of the neurons tended to be homogenised  
229 independently of the direction of the animal.

230

### 231 **The activity of vH neurons predicts the extent of exploration of an anxiogenic location**

232 We have shown that neurons of the vH change their activity patterns during the experience of anxiety.  
233 The described changes on neuronal activity were mainly related to the exploration of the open area.  
234 Next, we asked if neuronal activity during the exploration of the closed arm during a CO configuration,  
235 is influenced by the upcoming anxiety states. Observation of behavioural readouts (Figure 2) seem to

236 indicate a hesitation to enter the opened arm in the CO configuration, and after entering, there is not  
237 always a full commitment to explore it to the end. Therefore, we asked whether neuronal firing in the  
238 closed area might be predictive of the extent of an upcoming exploration in the anxiogenic area. To do  
239 so, we divided spatial explorations into two groups depending on how far animals explored the open  
240 arm during a particular trial: proximal and distal exploration trials were defined using an individual  
241 threshold for each session ( $Threshold = \frac{Furthest\ spatial\ bin - Nearest\ spatial\ bin}{2}$ ) (Figure 5A). We then tested if  
242 the neuronal activity before entering the open arm was informative of how far animals would venture  
243 into the open arm (proximal or distal explorations). By using the firing activity of each vH neuron prior  
244 to the entry to the open arm in the CO configuration, we represented each trial by a population vector  
245 built with the activity of all the co-recorded neurons during single recording days by  $T_n =$   
246  $\langle FR_{1n}, FR_{2n}, \dots, FR_{mn} \rangle$  where FR is the firing rate calculated in the closed area, n is the total number  
247 of trials, and m is the total number of neurons. If some anxiety-related information is computed during  
248 the exploration of the closed part of the ELM, we then anticipated that this neuronal activity would  
249 predict the extent of explorations (proximal or distal explorations) in the open anxiogenic arm. To  
250 better visualise the population activity in the close arm related to the future extent of exploration of  
251 the open arm, we calculated the principal components (PCA, see methods) of the population vectors  
252 and plotted the two first principal components (Figure 5A). We observed a clear separation between  
253 the two types of trials (proximal exploration, red; distal exploration, blue) based on the neuronal  
254 activity recorded. To further strengthen this observation, we trained a support vector machine (SVM,  
255 Figure 5B,C) using the entire neuronal activity (not the PCA values) in the closed arms for each  
256 recording day and we were able to predict the extent of exploration for single trials (see methods). A  
257 set of the best predictive neurons within a session was then used for each session SVM (see methods  
258 for description on how the neurons were selected). We found that during individual recording sessions  
259 (Figure 5C), the performance of the SVM was above chance levels in 10 out of 12 sessions and  
260 approximately 24% of the neurons (32 out of 133) were predictive of proximal vs distal explorations of  
261 the opened arm by using their firing rate during the closed arm of the CO configuration.

262         These analyses indicate that the neuronal representation of the anxiogenic location was not  
263 only dynamically modulated by the direct experience of anxiety, but already existed in the closed arm,  
264 possibly reflecting the intention to venture into the open arm. This implies that neuronal activity within  
265 the vH can predict upcoming anxiogenic situations, even when animals are still located in a safer  
266 environment without a direct exposure to an anxiety-inducing location.



## 267 Discussion

268

269 To investigate the neuronal dynamics governing anxiety behaviour in the vH, we recorded the activity  
270 of individual neurons while rats explored anxiogenic locations. In addition to the classical EPM, we  
271 used a novel ELM, which allowed us to rapidly change the anxiety content of the maze to expose rats  
272 to non-anxiogenic or anxiogenic configurations. We found that the neuronal activity of the vH  
273 exhibited a uniform spatial representation in the non-anxiogenic configuration of the ELM and that vH  
274 neurons displayed direction-dependent spatial firing when shuttling from one end of the ELM to  
275 another. When the anxiogenic location was introduced by removing the protective sidewalls from half  
276 of the track, the peak firing activity remapped towards the newly introduced anxiogenic location and  
277 direction-dependent firing was homogenised. Of important note, neuronal activity in the closed arm  
278 of the ELM predicted the extent of the upcoming exploration in the open arm even before rats entered  
279 into the open anxiogenic location.

280 Much of the anxiety research in freely-moving rodents has been relying on the EPM. Using the  
281 EPM, it has been shown that: amygdala projections to the vH control the expression of anxiety (Felix-  
282 Ortiz and Tye, 2014, Pi et al., 2020); there is an anxiety-associated neuronal activity in the vH routed  
283 to the mPFC (Cocchi et al., 2015); and that the vH-prefrontal pathway is critical for anxiety  
284 behaviour (Cocchi et al., 2015, Adhikari et al., 2011, Adhikari et al., 2010). The first part of this  
285 manuscript focuses on the activity of neurons recorded in the vH during the exploration of an EPM.  
286 We divided the exploration of the EPM into different trajectories. We observed a localised increase in  
287 the density of peak firing activity when rats crossed the centre in all the different C-C or C-O trajectories  
288 (Figure 1E). This might be explained by the fact that not only the open arms of an EPM are anxiogenic,  
289 but also the centre zone (Mendes-Gomes et al., 2011). Unfortunately, it proved difficult to analyse  
290 these effects quantitatively, because rats explored the open arms only minimally and sporadically,  
291 consistent with the anxiogenic nature of the EPM paradigm.

292 To overcome this problem, we introduced a novel ELM on which rats were motivated to shuttle  
293 from one extremity to the other to receive rewards. The ELM had three different configurations: non-  
294 anxiogenic (CC configuration); anxiogenic (CO configuration); and a configuration with new texture and  
295 visual cues (CT). Configurations could be quickly switched within a session. At the behavioural level,  
296 we observed anxiety-related behaviour during ELM exploration comparable to the ones during EPM  
297 exploration (Figure 2D, E). However, the main advantage of the ELM was the possibility to record the  
298 neuronal activity of the same vH neurons while rapidly modifying ELM configurations and motivating  
299 rats to spend more time in the anxiogenic location. After animals transited from a non-anxiogenic to  
300 an anxiogenic configuration, we observed a significant increment in peak firing activities  
301 predominately located in the open area. We attributed this recruitment or remapping of the neuronal

302 activity to the anxiogenic location. The neuronal mechanisms during spatial remapping remain largely  
303 elusive. Global remapping is a phenomenon observed in the dH when animals move from one  
304 environment to a different one(Leutgeb et al., 2005). One could argue that the simple removal of the  
305 walls is changing the environment of the ELM and therefore animals could perceive the open arm as a  
306 completely novel environment, inducing global remapping. Nevertheless, remapping of neuronal  
307 activity in a new environment is expected to be random and independent of a previously explored  
308 environment(Schlesiger et al., 2018, Leutgeb et al., 2005, Gauthier and Tank, 2018), even when  
309 emotional contexts are introduced(Moita et al., 2004). However, the remapping of neuronal activity  
310 observed in ventral hippocampal neurons is not arbitrary as it is most prominent in the anxiogenic  
311 location, contrary to a uniformly distributed peak activity in case of a random remapping. Nonetheless,  
312 the opening of walls *per se*, independent of the anxiogenic experience, could cause changes in vH  
313 neuronal activity. Previous work has shown that novel environments elicit the activation of vH neurons  
314 to a similar extent as an aversive stimulus(Graham et al., 2021). To show that the remapping of  
315 neuronal activity relies on anxiety, we changed the ELM from a CC to CT configuration during the same  
316 recording session. In the CT configuration, the previously open location changed to a novel one with a  
317 different floor texture and visual patterns in the inner part of the walls, but with protective sidewalls  
318 kept all along the track (Figure 2B). As anticipated, these changes equally induced a remapping of  
319 neuronal activity in the vH. Yet, in this case, the remapping was distributed over the length of the maze  
320 and the novel area did not show an increased number of peak firing activity (Figure 3C).  
321 Overrepresentation of behaviourally relevant locations is not novel in the hippocampus research field.  
322 It has been previously demonstrated that hippocampal place cells fire preferentially at reward  
323 locations during goal-directed tasks(Dupret et al., 2010, Hok et al., 2007, Hollup et al., 2001).  
324 Furthermore, as the vH is strongly associated with anxiety, the anxiogenic location represents a highly  
325 salient environment for vH-dependent computations(Bannerman et al., 2014). This is supported by our  
326 finding that the anxiogenic area is overrepresented by neurons of the vH, further strengthening its role  
327 in the emotional processing of information.

328 Another relevant observation relates to the directional firing of vH neurons. In the non-  
329 anxiogenic configuration of the ELM, the spatial activity of single vH neurons varied depending on the  
330 direction of exploration. Similar observations have been made in both the dH(McNaughton et al., 1983)  
331 and vH(Royer et al., 2010) for linear mazes, suggesting of a common principle underlying spatial  
332 information along the dorso-ventral axis of the hippocampus. With respect to the vH, Royer et al.  
333 hypothesised that the differential activity between inbound and outbound trajectories might be  
334 caused by the reward delivered at the end of the arm implying some reward-associated value coding.  
335 In contrast to Royer et al., we placed rewards at both extremities of the ELM. Although this does not  
336 invalidate the view of Royer et al., in our study, the direction-dependent firing was homogenised in

337 the anxiogenic configuration of the ELM, with vH neurons exhibiting similar firing independently of the  
338 direction of exploration in the open arm (Figure 4). We attribute the homogenisation of the direction-  
339 dependent firing in single vH neurons to the relevance of the anxiogenic location for vH-dependent  
340 computations. This is further supported by the results of the control experiments, in which we  
341 introduced a new, but not anxiogenic, environment to the ELM (Figure 4C) leading to fewer changes  
342 in vH neuronal activity.

343 Furthermore, the modulation of the neuronal activity in the anxiogenic location was not  
344 exclusively observed while the rats explored the open area. The CO configuration of the ELM contained  
345 protective walls in half of the maze, while the other half was entirely open. The neuronal population  
346 activity was a good predictor of the extent of the exploration of the open location, even when rats  
347 explored the closed arm before entering to the open location. Indeed, the neuronal activity in the  
348 closed arm was sufficient to infer whether rats would perform proximal or distal explorations of the  
349 open arm (Figure 5). Anxiety-related modulation of vH neuronal activity in both the closed and the  
350 open locations implies that not only a direct experience of anxiety enhances neuronal activity in the  
351 vH, but also its anticipation without a direct confrontation to an anxiety-inducing situation.

352 Overall, we provided evidence that the neuronal dynamics within the vH are subjected to the  
353 experience of anxiety. When an anxiogenic situation was encountered, vH neurons, first, over-  
354 represented this location (Figure 3); Second, their activity was tuned to the anxiogenic environment,  
355 impairing previous direction-dependent neuronal activity manifesting in the absence of anxiety (Figure  
356 4); Third, the neuronal activity of vH neurons reflected and predicted the exploration of an anxiogenic  
357 location (Figure 5). Collectively, these results expand our view of vH function by highlighting dynamic  
358 and predictive computations during anxiety.

## 359 **MATERIALS AND METHODS**

### 360 **Experimental subjects**

361 In total, nine long Evans rats from Charles River Laboratories (male, 250–600 g), were kept in 12 h light  
362 cycles during behavioral experiments (performed during the light cycle). All experimental procedures  
363 were performed under an approved licence of the Austrian Ministry of Science and the Medical  
364 University of Vienna.

365

### 366 **Surgery and microdrive implantation**

367 Using isoflurane, animals were anaesthetised (induction 4%, maintenance 1–2%; oxygen flow 2 l/min)  
368 and fixed to a stereotaxic frame. The body temperature was controlled using a heating pad. Iodine  
369 solution was applied to disinfect the surgery site and eye cream was used to protect the eyes. Local  
370 anaesthetic (xylocain® 2%) was used before the incision. Saline solution was injected subcutaneously  
371 every 2 h, to avoid dehydration. Seven stainless steel screws were anchored into the skull to improve  
372 the stability of the construct, and two of the screws were placed above the cerebellum as references  
373 for the electrophysiological recordings. Next, based on the rat brain atlas(Paxinos and Watson, 2007),  
374 a craniotomy was performed above the ventral hippocampal area (from bregma: -4.8 mm anterior,  
375 4.5 mm lateral, right hemisphere). After removal of the dura mater, an array of 12 independently  
376 movable, gold plated (100–500 k $\Omega$ ) wire tetrodes (13  $\mu$ m insulated tungsten wires, California Fine  
377 Wire, Grover Beach, CA) mounted in a custom-made microdrive (Miba Machine Shop, IST Austria) were  
378 implanted (Dorso-ventral: -6.5 mm). Paraffin wax was then applied around the tetrode array, and the  
379 lower part of the microdrive was cemented (Refobacin® Bone Cement) to the scalp. At the end, the  
380 surgery site was sutured, and systemic analgesia (metacam® 2 mg/ml, 0.5 ml/kg) was given. Animals  
381 were allowed at least 7 days of recovery time.

382

### 383 **Mazes description and behavior**

384 The elevated plus-maze (EPM) consisted of two closed (with protective side walls) and two open  
385 (without sidewalls) arms. The dimensions of the arms were 9 x 50 cm, the walls in the closed arms  
386 were 40 cm high, and the EPM was elevated 70 cm above the floor. Rats were placed on the EPM facing  
387 the open arm distal to the experimenter. Sessions lasted 5 - 8 min and were done at 200 lux of room  
388 light intensity(Walf and Frye, 2007).

389 The elevated linear-maze (ELM) consisted of a linear track of 120 cm length and 8 cm in width.  
390 The maze was elevated by 105 cm above the ground. A reward was given at both endpoints (two 20  
391 mg sugar pellets). Three possible configurations were presented during the EPM exploration: A Closed-  
392 Closed configuration (CC), consisting of 4 black panels acting as side walls which covered the entire

393 length of the track and prevented the animal from experiencing the height; a Closed-Open  
394 configuration (CO) which consisted on 2 black panels acting as walls covering one half of the maze and  
395 leaving the other half completely open, resulting in an anxiogenic area; and a third configuration was  
396 called Closed-Texture (CT) which consisted on 4 black panels acting as walls covering the entire length  
397 of the maze. The difference with the CC configuration was that in half of the maze (the half which was  
398 open in the CO configuration) coloured geometrical figures were added to the sidewalls as new visual  
399 patterns and the texture of the floor was changed. The ELM sessions were composed by the  
400 presentation of the CO and CT configurations, each preceded by a CC configuration. Depending on the  
401 motivation of animals to explore, CC and CT configurations lasted 5 – 15 minutes while CO  
402 configurations lasted between 5 – 20 minutes. When a CC configuration was preceding a CT  
403 configuration, we refer to the configuration as CC2.

404 Tracking of the rats' movement was monitored by triangulating the signal from three LEDs  
405 (red, blue, green) placed on the implanted headstage and recorded at 25 frames per second by an  
406 overhead video camera (Sony).

407

#### 408 ***In vivo* electrophysiology**

409 Either an Axona headstage (HS-132A, 2 × 32 channels, Axona Ltd) or Intan headstage (2 x RHD32-  
410 channel headstage) were used to pre-amplify the extracellular electric signals from the tetrodes. For  
411 the Axona headstages, output signals were amplified 1000 × via a 64-channel amplifier and then  
412 digitised continuously with a sampling rate of 24 kHz at 16-bit resolution, using a 64-channel analogue-  
413 to-digital converter computer card (Axona Ltd). For the Intan headstages, signals were acquired with  
414 the RHD32 channel headstage and directly sent to the Intan 512ch/1024ch recording controller. Single-  
415 unit offline detection was performed by thresholding the digitally filtered signal (0.8 – 5 kHz) over 5  
416 standard deviations from the root mean square in 0.2 ms sliding windows. For each single-unit, 32 data  
417 points (1.33 ms) were sampled. A principal component analysis was implemented to extract the first  
418 three components of each spike waveform for each tetrode channel (Csicsvari et al., 1998).

419 Spike waveforms from individual neurons were detected using the KlustaKwik automatic  
420 clustering software (Kadir et al., 2014). Using the Klusters software (Hazan et al., 2006), single units  
421 were isolated manually by verifying the waveform shape, waveform amplitude across tetrode's  
422 channels, temporal autocorrelation (to assess the refractory period of a single-unit) and cross-  
423 correlation (to assess a common refractory period across single-units). The stability of single-units was  
424 confirmed by examining spike features over time.

425

#### 426 **Histology**

427 To confirm the position of the recording sites, rats were deeply anaesthetised with urethane and  
428 lesions were made at the tip of the tetrodes using a 30  $\mu$ A unipolar current for 5 - 10 s (Stimulus  
429 Isolator, World Precision Instruments). Then, rats were perfused with saline followed by 20 min.  
430 fixation with 4% paraformaldehyde, 15% (v/v) saturated picric acid and 0.05% glutaraldehyde in 0.1 M  
431 phosphate buffer. Serial coronal sections were cut at 70 or 100  $\mu$ m with a vibratome (Leica). Sections  
432 containing a lesion were Nissl-stained. One rat, for which histological data could not be confirmed, was  
433 included based on: insertion coordinates, oscillatory LFP profile and similarity of neuronal activity.

434

#### 435 **Firing rate maps and trajectory linearisation**

436 To compute firing rate maps found in figure 1, bins of 10x10 cm were created. For each bin, the total  
437 number of spikes was divided by the rat's occupancy (in seconds): the firing rate maps were smoothed  
438 by convolving them into two dimensions with a Gaussian low-pass filter. For the EPM, by using the  
439 geometry of the maze, the centre and the arms were defined. Trajectories were then found by  
440 demarcating the consecutive tracked positions going from the furthest point reached on the arm, to  
441 the furthest point reached on the next visited arm. To linearise this position, each two-dimensional  
442 point (x, y) was projected to the directional vector describing the arm to which that point belongs. Each  
443 projection was made by using the following equation:

$$444 \quad \textit{Projection} = \frac{P_{x,y} \cdot D_{arm}}{\|D_{arm}\|}$$

445 Where  $P_{x,y}$  is the position to be projected,  $D_{arm}$  is the directional vector of the corresponding arm and  
446  $\|D\|$  denotes the norm of the vector D. Each trajectory was composed of three parts: Starting arm,  
447 centre and ending arm. For the starting and ending arm, the activity was calculated over the space by  
448 dividing the total number of spikes on each linear bin (5 cm) over the occupancy (in seconds) on that  
449 particular bin. However, due to the different possible trajectories that the animal can follow in the  
450 centre, the activity there was divided into five fixed time bins. Then, the linear firing rate maps (activity  
451 in the starting, centre and ending arm) were smoothed by convolving them with a 1-D Gaussian  
452 function. Linear firing rate maps on the ELM were calculated by dividing the space into bins (2.5 cm  
453 each) and for each bin, the corresponding spikes of each neuron were summed and divided by the  
454 occupancy (in seconds).

455

#### 456 **Coverage index**

457 The coverage term used is the same as the sparsity term used by Skaggs in 1996 (Skaggs et al., 1996).

458 The formula is:

459

$$460 \quad \textit{Coverage} = \frac{(\sum p_i \mu_i)^2}{\sum p_i \mu_i^2}$$

461

462 where the spatial bins of the environment are denoted by  $i$ ,  $p_i$  is the probability of occupying that bin  
463 and  $\mu_i$  is the mean firing rate of the neuron in that particular bin.

464

#### 465 **Place field similarity**

466 The place field similarity was calculated by using the Spearman correlation between the z-scored linear  
467 firing rate map of a neuron while the animal is moving in one direction and the z-scored linear firing  
468 rate map of the same neuron while the animal is moving in the other direction.

469

#### 470 **General Linear Model and neuronal spike activity relation to speed**

471 We modelled the spike activity of each neuron (for different ELM configurations) by using the  
472 instantaneous running speed of the animal at each moment:  $Spk_t = \beta_0 + \beta_1 S_t$  where  $Spk$  is the  
473 number of spikes at a given time  $t$  and  $S$  is the instantaneous running speed at the same time  $t$ .  
474 Residuals of the model were used as the spike-associated activity of the neurons, controlled by the  
475 speed of the animal.

476

#### 477 **Neuronal state-space**

478 By using the firing rate of each neuron prior to the entry to the open arm in the CO configuration, each  
479 trial was represented by a population vector built with the activity of all the co-recorded neurons  
480 during that particular day  $T_n = \langle FR_{1n}, FR_{2n}, \dots, FR_{mn} \rangle$  where FR is the firing rate,  $n$  is the total  
481 number of trials, and  $m$  is the total number of neurons.

482

#### 483 **SVM classifier and neuronal selection**

484 The exploration of the open arm on the ELM was divided into either proximal exploration or distal  
485 exploration using a threshold per session ( $Threshold = \frac{Furthest\ spatial\ bin - Nearest\ spatial\ bin}{2}$ ). A support vector  
486 machine classifier with a linear kernel was used to determine if, based on the neuronal activity during  
487 the closed arm of the CO configuration, the extent of the exploration of a given trial (proximal or distal  
488 exploration) was possible. To do so, in a “one-leave out cross-validation” fashion, the identity of each  
489 trial was predicted by training the classifier with the activity of all the other trials. We then iteratively  
490 check the performance of the SVM for all possible combinations of neurons for each session. The  
491 neuron combination that gave the highest performance was then assumed to be optimal. In case that  
492 more than one possible combination was giving the exact same value of performance, the neurons  
493 with the higher number of appearances in the combinations (75% quartile of the repetition  
494 distribution) were selected as the set of “informative” neurons.

495           Due to the fact that the distal and proximal trial distributions were not even, in order to  
496 determine if a given performance value was in fact better than random, we shuffle 1000 times the trial  
497 IDs (distal or proximal) and repeated the classification. Only performance values above the 95%  
498 percentile of the shuffle distribution were considered as successful.

499           Two recording sessions were excluded due to either a low number of co-recorded cells ( $n < 3$ )  
500 or insufficient exploration of the maze.

501

## 502 **Statistical Analyses**

503 All calculations were made in MATLAB (Mathworks, version R2015b and R2019b) and statistical  
504 analyses were performed with MATLAB and Microsoft Excel. All the statistical tests used in this  
505 manuscript were non-parametric unless stated otherwise. Raw data was visualised and visually  
506 evaluated with Neuroscope (<http://neurosuite.sourceforge.net/information.html>).

507           One-Way ANOVA with Tukey-Kramer for multiple comparison was used for the following  
508 analyses: Time spent on each of the EPM and ELM areas (Figure 1A, Figure 2E). Wilcoxon signed-rank  
509 test was used for: time spent in changing and non-changing arms (Figure 2D); spatial broadening of  
510 neuronal activity (Figure 3E). Chi-squared test was used for: Proportions of peak firing activities (Figure  
511 3B, C and Figure S1A, B). Two-sample Kolmogorov-Smirnov test was used for comparing the PFS index  
512 distributions (Figure 4B, C and Figure S1C, D).

513           Analyses of CC and CO have an  $n = 133$ , while analyses of CC2 and CT have an  $n = 75$ . Both  
514 numbers correspond to the recorded neurons in the vH. Time spent measurements were done per  
515 session. EPM sessions ( $n = 16$ ), ELM Sessions ( $n = 14$ ). Control sessions of CC2 and CT ( $n = 5$ ).

516

## 517 **ADDITIONAL INFORMATION**

518

### 519 **Lead contact**

520 Further information and requests may be directed to the Lead Contact, Thomas Klausberger  
521 ([thomas.klausberger@meduniwien.ac.at](mailto:thomas.klausberger@meduniwien.ac.at)).

### 522 **Data and code availability**

523 Any original code or additional information required to reanalyse the data reported in this paper is  
524 available from the lead contact upon request.

525

## 526 **Acknowledgements**



527 This work was supported by grant P 29588 of the Austrian Science Fund (T.K.), ERC starting grant  
528 716761 (S.C.) and a Swiss National Science Foundation professorship grant (170654) (S.C.).

529 **Contributions**

530 H. M-V., S.C. and T.K. contributed to experiments, data analysis and the preparation of the  
531 manuscript.

532 **Competing interests**

533 The authors declare no competing interests.

534 **References**

535

- 536 ADHIKARI, A., TOPIWALA, M. A. & GORDON, J. A. 2010. Synchronized activity between the ventral  
537 hippocampus and the medial prefrontal cortex during anxiety. *Neuron*, 65, 257-69,  
538 doi:10.1016/j.neuron.2009.12.002.
- 539 ADHIKARI, A., TOPIWALA, M. A. & GORDON, J. A. 2011. Single units in the medial prefrontal cortex  
540 with anxiety-related firing patterns are preferentially influenced by ventral hippocampal  
541 activity. *Neuron*, 71, 898-910, doi:10.1016/j.neuron.2011.07.027.
- 542 BANNERMAN, D. M., SPRENGEL, R., SANDERSON, D. J., MCHUGH, S. B., RAWLINS, J. N., MONYER, H.  
543 & SEEBURG, P. H. 2014. Hippocampal synaptic plasticity, spatial memory and anxiety. *Nat*  
544 *Rev Neurosci*, 15, 181-192, doi:10.1038/nrn3677.
- 545 BIRBAUMER, N., GRODD, W., DIEDRICH, O., KLOSE, U., ERB, M., LOTZE, M., SCHNEIDER, F., WEISS, U.  
546 & FLOR, H. 1998. fMRI reveals amygdala activation to human faces in social phobics.  
547 *Neuroreport*, 9, 1223-1226, doi:10.1097/00001756-199804200-00048.
- 548 CALHOON, G. G. & TYE, K. M. 2015. Resolving the neural circuits of anxiety. *Nat Neurosci*, 18, 1394-  
549 404, doi:10.1038/nn.4101.
- 550 CIOCCHI, S., PASSECKER, J., MALAGON-VINA, H., MIKUS, N. & KLAUSBERGER, T. 2015. Brain  
551 computation. Selective information routing by ventral hippocampal CA1 projection neurons.  
552 *Science*, 348, 560-3, doi:10.1126/science.aaa3245.
- 553 CSICSVARI, J., HIRASE, H., CZURKO, A. & BUZSAKI, G. 1998. Reliability and state dependence of  
554 pyramidal cell-interneuron synapses in the hippocampus: an ensemble approach in the  
555 behaving rat. *Neuron*, 21, 179-89, doi:10.1016/s0896-6273(00)80525-5.
- 556 CZURKO, A., HIRASE, H., CSICSVARI, J. & BUZSAKI, G. 1999. Sustained activation of hippocampal  
557 pyramidal cells by 'space clamping' in a running wheel. *Eur J Neurosci*, 11, 344-52,  
558 doi:10.1046/j.1460-9568.1999.00446.x.
- 559 DAVIDSON, R. J., ABERCROMBIE, H., NITSCHKE, J. B. & PUTNAM, K. 1999. Regional brain function,  
560 emotion and disorders of emotion. *Current Opinion in Neurobiology*, 9, 228-234,  
561 doi:10.1016/S0959-4388(99)80032-4.
- 562 DAVIS, M., WALKER, D. L., MILES, L. & GRILLON, C. 2010. Phasic vs sustained fear in rats and humans:  
563 role of the extended amygdala in fear vs anxiety. *Neuropsychopharmacology*, 35, 105-35,  
564 doi:10.1038/npp.2009.109.
- 565 DUPRET, D., O'NEILL, J., PLEYDELL-BOUVERIE, B. & CSICSVARI, J. 2010. The reorganization and  
566 reactivation of hippocampal maps predict spatial memory performance. *Nat Neurosci*, 13,  
567 995-1002, doi:10.1038/nn.2599.
- 568 DUVARCI, S., BAUER, E. P. & PARE, D. 2009. The Bed Nucleus of the Stria Terminalis Mediates Inter-  
569 individual Variations in Anxiety and Fear. *Journal of Neuroscience*, 29, 10357-10361,  
570 doi:10.1523/Jneurosci.2119-09.2009.
- 571 FELIX-ORTIZ, A. C. & TYE, K. M. 2014. Amygdala inputs to the ventral hippocampus bidirectionally  
572 modulate social behavior. *J Neurosci*, 34, 586-95, doi:10.1523/JNEUROSCI.4257-13.2014.
- 573 GAUTHIER, J. L. & TANK, D. W. 2018. A Dedicated Population for Reward Coding in the Hippocampus.  
574 *Neuron*, 99, 179-193 e7, doi:10.1016/j.neuron.2018.06.008.
- 575 GRAEFF, F. G., SILVEIRA, M. C., NOGUEIRA, R. L., AUDI, E. A. & OLIVEIRA, R. M. 1993. Role of the  
576 amygdala and periaqueductal gray in anxiety and panic. *Behavioural brain research*, 58, 123-  
577 31, doi:10.1016/0166-4328(93)90097-a.
- 578 GRAHAM, J., D'AMBRA, A. F., JUNG, S. J., TERATANI-OTA, Y., VISHWAKARMA, N., VENKATESH, R.,  
579 PARIGI, A., ANTZOULATOS, E. G., FIORAVANTE, D. & WILTGEN, B. J. 2021. High-Frequency  
580 Stimulation of Ventral CA1 Neurons Reduces Amygdala Activity and Inhibits Fear. *Front*  
581 *Behav Neurosci*, 15, 595049, doi:10.3389/fnbeh.2021.595049.
- 582 GRUNDEMANN, J., BITTERMAN, Y., LU, T., KRABBE, S., GREWE, B. F., SCHNITZER, M. J. & LUTHI, A.  
583 2019. Amygdala ensembles encode behavioral states. *Science*, 364,  
584 doi:10.1126/science.aav8736.
- 585

- 586 HAZAN, L., ZUGARO, M. & BUZSAKI, G. 2006. Klusters, NeuroScope, NDManager: a free software  
587 suite for neurophysiological data processing and visualization. *J Neurosci Methods*, 155, 207-  
588 16, doi:10.1016/j.jneumeth.2006.01.017.
- 589 HOK, V., LENCK-SANTINI, P. P., ROUX, S., SAVE, E., MULLER, R. U. & POU CET, B. 2007. Goal-related  
590 activity in hippocampal place cells. *The Journal of neuroscience : the official journal of the*  
591 *Society for Neuroscience*, 27, 472-82, doi:10.1523/JNEUROSCI.2864-06.2007.
- 592 HOLLUP, S. A., MOLDEN, S., DONNETT, J. G., MOSER, M. B. & MOSER, E. I. 2001. Accumulation of  
593 hippocampal place fields at the goal location in an annular watermaze task. *The Journal of*  
594 *neuroscience : the official journal of the Society for Neuroscience*, 21, 1635-44.
- 595 JIMENEZ, J. C., SU, K., GOLDBERG, A. R., LUNA, V. M., BIANE, J. S., ORDEK, G., ZHOU, P., ONG, S. K.,  
596 WRIGHT, M. A., ZWEIFEL, L., PANINSKI, L., HEN, R. & KHEIRBEK, M. A. 2018. Anxiety Cells in a  
597 Hippocampal-Hypothalamic Circuit. *Neuron*, 97, 670-683 e6,  
598 doi:10.1016/j.neuron.2018.01.016.
- 599 JUNG, M. W., WIENER, S. I. & MCNAUGHTON, B. L. 1994. Comparison of spatial firing characteristics  
600 of units in dorsal and ventral hippocampus of the rat. *J Neurosci*, 14, 7347-56,  
601 doi:10.1523/JNEUROSCI.14-12-07347.1994
- 602 KADIR, S. N., GOODMAN, D. F. & HARRIS, K. D. 2014. High-dimensional cluster analysis with the  
603 masked EM algorithm. *Neural Computation*, 26, 2379-94, doi:10.1162/NECO\_a\_00661.
- 604 KESSLER, R. C., MCGONAGLE, K. A., ZHAO, S. Y., NELSON, C. B., HUGHES, M., ESHLEMAN, S.,  
605 WITTCHEN, H. U. & KENDLER, K. S. 1994. Lifetime and 12-Month Prevalence of Dsm-III-R  
606 Psychiatric-Disorders in the United-States - Results from the National-Comorbidity-Survey.  
607 *Archives of General Psychiatry*, 51, 8-19, doi:10.1001/archpsyc.1994.03950010008002
- 608 KIM, S. Y., ADHIKARI, A., LEE, S. Y., MARSH, J. H., KIM, C. K., MALLORY, C. S., LO, M., PAK, S.,  
609 MATTIS, J., LIM, B. K., MALENKA, R. C., WARDEN, M. R., NEVE, R., TYE, K. M. & DEISSEROTH,  
610 K. 2013. Diverging neural pathways assemble a behavioural state from separable features in  
611 anxiety. *Nature*, 496, 219-23, doi:10.1038/nature12018.
- 612 KIM, W. B. & CHO, J. H. 2020. Encoding of contextual fear memory in hippocampal-amygdala circuit.  
613 *Nat Commun*, 11, 1382, doi:10.1038/s41467-020-15121-2.
- 614 KJELSTRUP, K. G., TUVNES, F. A., STEFFENACH, H. A., MURISON, R., MOSER, E. I. & MOSER, M. B.  
615 2002. Reduced fear expression after lesions of the ventral hippocampus. *Proc Natl Acad Sci U*  
616 *S A*, 99, 10825-30, doi:10.1073/pnas.152112399.
- 617 LEUTGEB, S., LEUTGEB, J. K., BARNES, C. A., MOSER, E. I., MCNAUGHTON, B. L. & MOSER, M. B. 2005.  
618 Independent codes for spatial and episodic memory in hippocampal neuronal ensembles.  
619 *Science*, 309, 619-23, doi:10.1126/science.1114037.
- 620 MCNAUGHTON, B. L., BARNES, C. A. & O'KEEFE, J. 1983. The contributions of position, direction, and  
621 velocity to single unit activity in the hippocampus of freely-moving rats. *Experimental brain*  
622 *research*, 52, 41-9, doi:10.1007/bf00237147.
- 623 MENDES-GOMES, J., MIGUEL, T. T., AMARAL, V. C. & NUNES-DE-SOUZA, R. L. 2011. Corticosterone  
624 does not change open elevated plus maze-induced antinociception in mice. *Hormones and*  
625 *Behavior*, 60, 408-13, doi:10.1016/j.yhbeh.2011.07.004.
- 626 MOITA, M. A., ROSIS, S., ZHOU, Y., LEDOUX, J. E. & BLAIR, H. T. 2004. Putting fear in its place:  
627 remapping of hippocampal place cells during fear conditioning. *The Journal of neuroscience :*  
628 *the official journal of the Society for Neuroscience*, 24, 7015-23,  
629 doi:10.1523/JNEUROSCI.5492-03.2004.
- 630 MULLER, R. U., BOSTOCK, E., TAUBE, J. S. & KUBIE, J. L. 1994. On the directional firing properties of  
631 hippocampal place cells. *The Journal of neuroscience : the official journal of the Society for*  
632 *Neuroscience*, 14, 7235-51, doi:10.1523/JNEUROSCI.5492-03.2004
- 633 O'KEEFE, J. 1976. Place units in the hippocampus of the freely moving rat. *Exp Neurol*, 51, 78-109,  
634 doi:10.1016/0014-4886(76)90055-8
- 635 OKEEFE, J. & NADEL, L. 1979. The Cognitive Map as a Hippocampus. *Behavioral and Brain Sciences*, 2,  
636 520-528, doi:10.1017/S0140525x00064256.

- 637 PADILLA-COREANO, N., BOLKAN, S. S., PIERCE, G. M., BLACKMAN, D. R., HARDIN, W. D., GARCIA-  
638 GARCIA, A. L., SPELLMAN, T. J. & GORDON, J. A. 2016. Direct Ventral Hippocampal-Prefrontal  
639 Input Is Required for Anxiety-Related Neural Activity and Behavior. *Neuron*, 89, 857-66,  
640 doi:10.1016/j.neuron.2016.01.011.
- 641 PARK, J., WOOD, J., BONDI, C., DEL ARCO, A. & MOGHADDAM, B. 2016. Anxiety Evokes Hypofrontality  
642 and Disrupts Rule-Relevant Encoding by Dorsomedial Prefrontal Cortex Neurons. *J Neurosci*,  
643 36, 3322-35, doi:10.1523/JNEUROSCI.4250-15.2016.
- 644 PAXINOS, G. & WATSON, C. 2007. *The rat brain in stereotaxic coordinates*, Amsterdam ; Boston ;,  
645 Academic Press/Elsevier.
- 646 PELLOW, S., CHOPIN, P., FILE, S. E. & BRILEY, M. 1985. Validation of Open - Closed Arm Entries in an  
647 Elevated Plus-Maze as a Measure of Anxiety in the Rat. *Journal of Neuroscience Methods*, 14,  
648 149-167, doi:10.1016/0165-0270(85)90031-7.
- 649 PI, G., GAO, D., WU, D., WANG, Y., LEI, H., ZENG, W., GAO, Y., YU, H., XIONG, R., JIANG, T., LI, S.,  
650 WANG, X., GUO, J., ZHANG, S., YIN, T., HE, T., KE, D., LI, R., LI, H., LIU, G., YANG, X., LUO, M.  
651 H., ZHANG, X., YANG, Y. & WANG, J. Z. 2020. Posterior basolateral amygdala to ventral  
652 hippocampal CA1 drives approach behaviour to exert an anxiolytic effect. *Nature*  
653 *communications*, 11, 183, doi:10.1038/s41467-019-13919-3.
- 654 POU CET, B., THINUS-BLANC, C. & MULLER, R. U. 1994. Place cells in the ventral hippocampus of rats.  
655 *Neuroreport*, 5, 2045-8, doi:10.1097/00001756-199410270-00014.
- 656 RAUCH, S. L., SAVAGE, C. R., ALPERT, N. M., FISCHMAN, A. J. & JENIKE, M. A. 1997. The functional  
657 neuroanatomy of anxiety: A study of three disorders using positron emission tomography  
658 and symptom provocation. *Biological Psychiatry*, 42, 446-452, doi:10.1016/S0006-  
659 3223(97)00145-5.
- 660 REDMOND, D. E., JR. & HUANG, Y. H. 1979. Current concepts. II. New evidence for a locus coeruleus-  
661 norepinephrine connection with anxiety. *Life sciences*, 25, 2149-62, doi:10.1016/0024-  
662 3205(79)90087-0.
- 663 ROYER, S., SIROTA, A., PATEL, J. & BUZSAKI, G. 2010. Distinct representations and theta dynamics in  
664 dorsal and ventral hippocampus. *J Neurosci*, 30, 1777-87, doi:10.1523/JNEUROSCI.4681-  
665 09.2010.
- 666 SANDFORD, J. J., ARGYROPOULOS, S. V. & NUTT, D. J. 2000. The psychobiology of anxiolytic drugs.  
667 Part 1: Basic neurobiology. *Pharmacol Ther*, 88, 197-212, doi:10.1016/s0163-7258(00)00082-  
668 6.
- 669 SCHLESIGER, M. I., BOUBLIL, B. L., HALES, J. B., LEUTGEB, J. K. & LEUTGEB, S. 2018. Hippocampal  
670 Global Remapping Can Occur without Input from the Medial Entorhinal Cortex. *Cell reports*,  
671 22, 3152-3159, doi:10.1016/j.celrep.2018.02.082.
- 672 SCHUMACHER, A., VILLARUEL, F. R., USSLING, A., RIAZ, S., LEE, A. C. H. & ITO, R. 2018. Ventral  
673 Hippocampal CA1 and CA3 Differentially Mediate Learned Approach-Avoidance Conflict  
674 Processing. *Curr Biol*, 28, 1318-1324 e4, doi:10.1016/j.cub.2018.03.012.
- 675 SHAH, A. A. & TREIT, D. 2003. Excitotoxic lesions of the medial prefrontal cortex attenuate fear  
676 responses in the elevated-plus maze, social interaction and shock probe burying tests. *Brain*  
677 *Research*, 969, 183-194, doi:10.1016/S0006-8993(03)02299-6.
- 678 SKAGGS, W. E., MCNAUGHTON, B. L., WILSON, M. A. & BARNES, C. A. 1996. Theta phase precession in  
679 hippocampal neuronal populations and the compression of temporal sequences.  
680 *Hippocampus*, 6, 149-72, doi:10.1002/(SICI)1098-1063(1996)6:2<149::AID-HIPO6>3.0.CO;2-K.
- 681 STEIMER, T. 2002. The biology of fear- and anxiety-related behaviors. *Dialogues in clinical*  
682 *neuroscience*, 4, 231-49, doi:10.31887/DCNS.2002.4.3/tsteimer
- 683 TOVOTE, P., FADOK, J. P. & LUTHI, A. 2015. Neuronal circuits for fear and anxiety. *Nat Rev Neurosci*,  
684 16, 317-31, doi:10.1038/nrn3945.
- 685 TYE, K. M., PRAKASH, R., KIM, S. Y., FENNO, L. E., GROSENICK, L., ZARABI, H., THOMPSON, K. R.,  
686 GRADINARU, V., RAMAKRISHNAN, C. & DEISSEROTH, K. 2011. Amygdala circuitry mediating  
687 reversible and bidirectional control of anxiety. *Nature*, 471, 358-62,  
688 doi:10.1038/nature09820.

- 689 WALF, A. A. & FRYE, C. A. 2007. The use of the elevated plus maze as an assay of anxiety-related  
690 behavior in rodents. *Nat Protoc*, 2, 322-8, doi:10.1038/nprot.2007.44.
- 691 WIENER, S. I., PAUL, C. A. & EICHENBAUM, H. 1989. Spatial and behavioral correlates of hippocampal  
692 neuronal activity. *J Neurosci*, 9, 2737-63, doi:10.1523/JNEUROSCI.09-08-02737.1989
- 693 WITTCHEH, H. U., JACOBI, F., REHM, J., GUSTAVSSON, A., SVENSSON, M., JONSSON, B., OLESEN, J.,  
694 ALLGULANDER, C., ALONSO, J., FARAVELLI, C., FRATIGLIONI, L., JENNUM, P., LIEB, R.,  
695 MAERCKER, A., VAN OS, J., PREISIG, M., SALVADOR-CARULLA, L., SIMON, R. & STEINHAUSEN,  
696 H. C. 2011. The size and burden of mental disorders and other disorders of the brain in  
697 Europe 2010. *European Neuropsychopharmacology*, 21, 655-679,  
698 doi:10.1016/j.euroneuro.2011.07.018.
- 699 WOLFF, S. B. E., GRUNDEMANN, J., TOVOTE, P., KRABBE, S., JACOBSON, G. A., MULLER, C., HERRY, C.,  
700 EHRLICH, I., FRIEDRICH, R. W., LETZKUS, J. J. & LUTHI, A. 2014. Amygdala interneuron  
701 subtypes control fear learning through disinhibition. *Nature*, 509, 453-+,  
702 doi:10.1038/Nature13258.
- 703
- 704

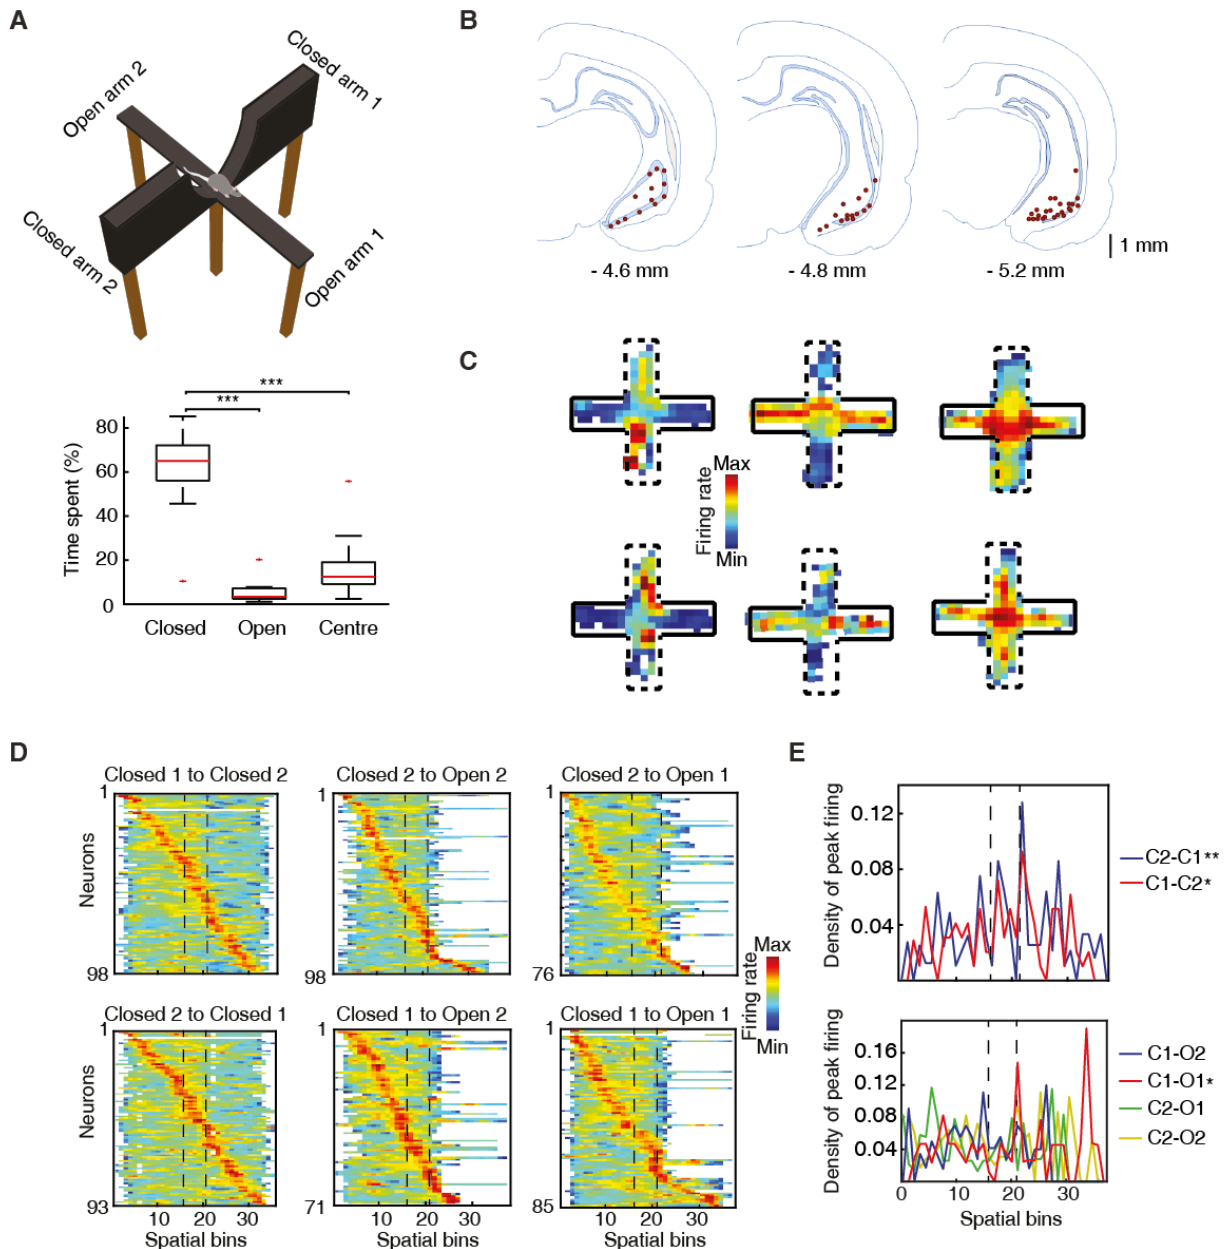

705  
 706 **Figure 1. The activity of ventral hippocampal neurons is dynamically modulated during elevated-**  
 707 **plus-maze exploration. (A).** Top, picture of the EPM. Bottom, the percentage of the time spent in  
 708 different areas by the rats ( $n = 6$ ) during the exploration of the EPM. The time spent in closed arms is  
 709 significantly higher than in the open arms and the centre ( $p = 9.5615e-10$ ,  $p = 9.5657e-10$ , respectively.  
 710 One-way ANOVA, Tukey-Kramer for multiple comparisons) **(B).** Location of the recording in the ventral  
 711 hippocampus are indicated by red dots in three consecutive coronal sections ( $n = 47$ , number of  
 712 rats = 8, one additional rat, for which histological location could not be confirmed, was included based  
 713 on: insertion coordinates, oscillatory LFP profile and similarity of neuronal activity) **(C).** Firing rate of 6  
 714 individual neurons during the exploration of the EPM. Full black lines denote a closed arm while the  
 715 dotted lines indicate an open arm. Note three different anxiety-related activity patterns: increased  
 716 firing in the open arms (left) or in the closed arms (centre) or in the centre (right). **(D).** Z-transformed  
 717 firing rates (colour-coded) of ventral hippocampal neurons during the exploration of the EPM,  
 718 separated by trajectories and sorted by the spatial location of their peak firing activity. Dotted lines  
 719 indicated the centre area. **(E).** Top, density plot of the peak firing activity location for all neurons  
 720 recorded during the journeys from a closed arm to the other during EPM exploration ( $p(C2-C1) =$

721 0.0038,  $p(C1-C2) = 0.0352$ , bootstrapping). Note the increased number of peak activity at the centre  
722 (i.e. the only open area for these trajectories). Bottom, same as on the top, but for the trajectories  
723 between a closed arm and an open arm ( $p(C1-O2) = 0.67$ ,  $p(C1-O1) = 0.0108$ ,  $p(C2-O1) = 0.79$ ,  $p(C2-$   
724  $O2) = 0.1654$ , bootstrapping). The dotted lines denote the beginning and end of the centre area.

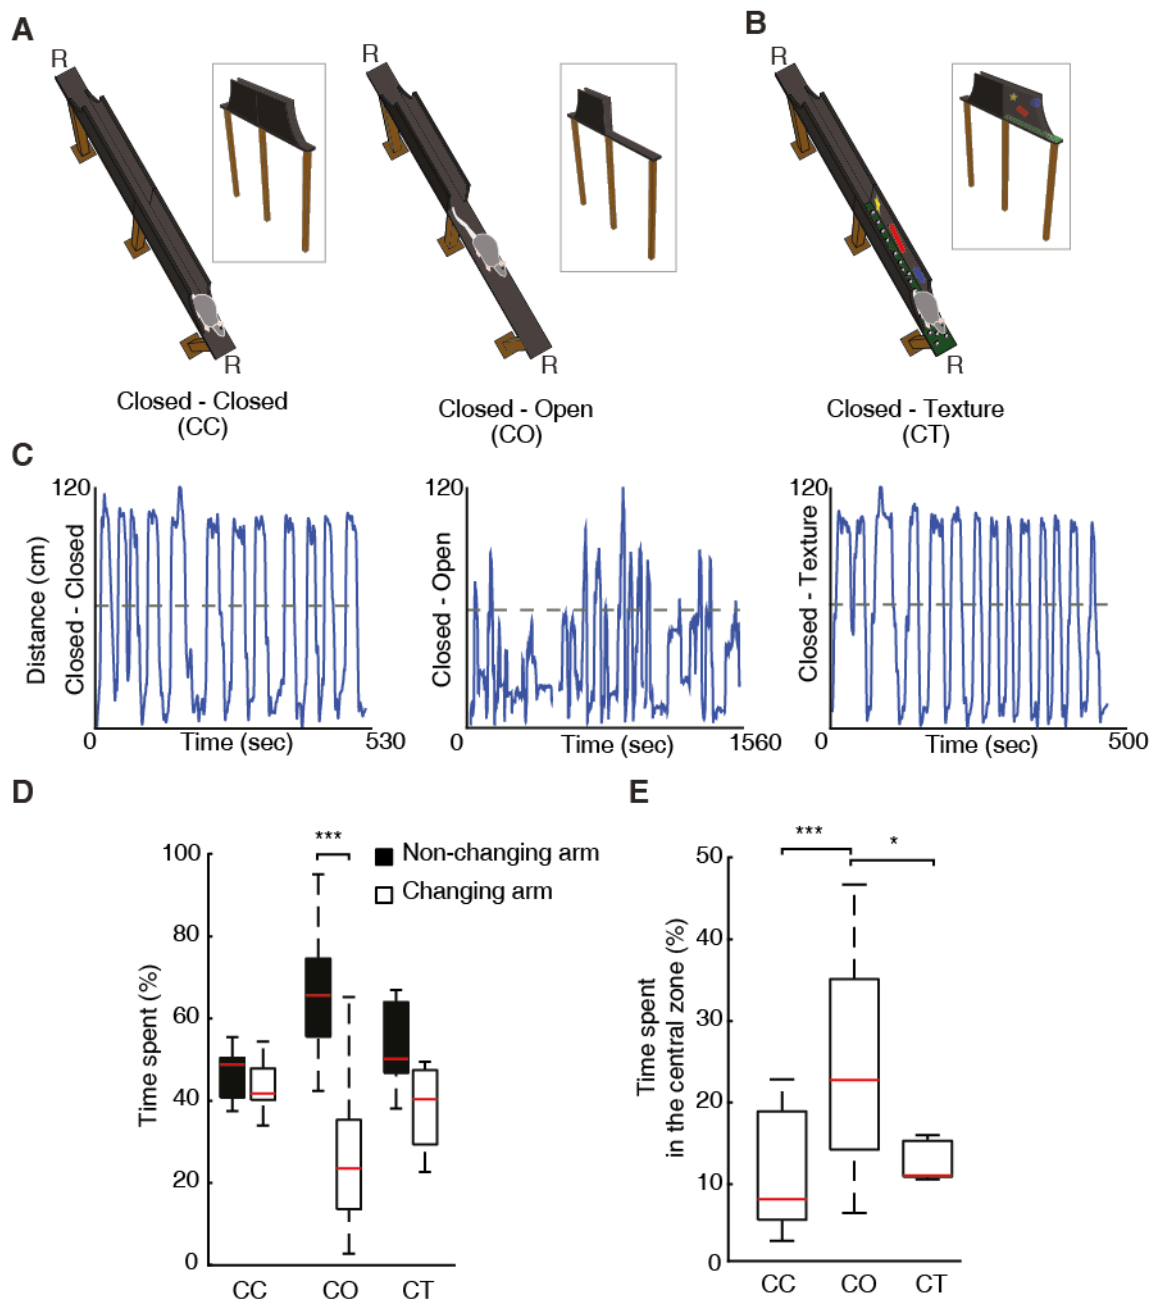

725

726 **Figure 2. Removal of protective sidewalls along an elevated-linear-maze induces anxiety behaviour.**  
 727 **(A).** ELM configurations with sidewalls along the entire track (CC, both arms closed, left), and with  
 728 sidewalls removed for half of the track (CO, called one arm closed – one arm open, right). Note the  
 729 presence of a non-changing arm, while the other arm changes from a closed to an open configuration.  
 730 R, indicates locations of food reward. **(B).** ELM configuration with both arms closed, but the floor  
 731 texture and visual cues on inner-walls are changed in one of the arms (CT, closed and texture arm). **(C).**  
 732 Linearised trajectories of a rat running in the three different ELM configurations during a single  
 733 behavioural session. The grey line denotes the centre of the linear maze and the division between the  
 734 two arms. **(D).** Time spent in both the non-changing and the changing arm in each configuration.  
 735 Significant differences in the time spent appeared solely in the CO configuration ( $p = 1.45e-05$ ,  
 736 Wilcoxon signed-rank). **(E).** More time spent in the central zone (defined as 11.5 cm around centre of  
 737 the track) in the CO configuration in comparison to the CC and CT configurations ( $p = 2e-05$  and  $p =$   
 738  $0.034$  respectively, one-way ANOVA, Tukey-Kramer for multiple comparisons).



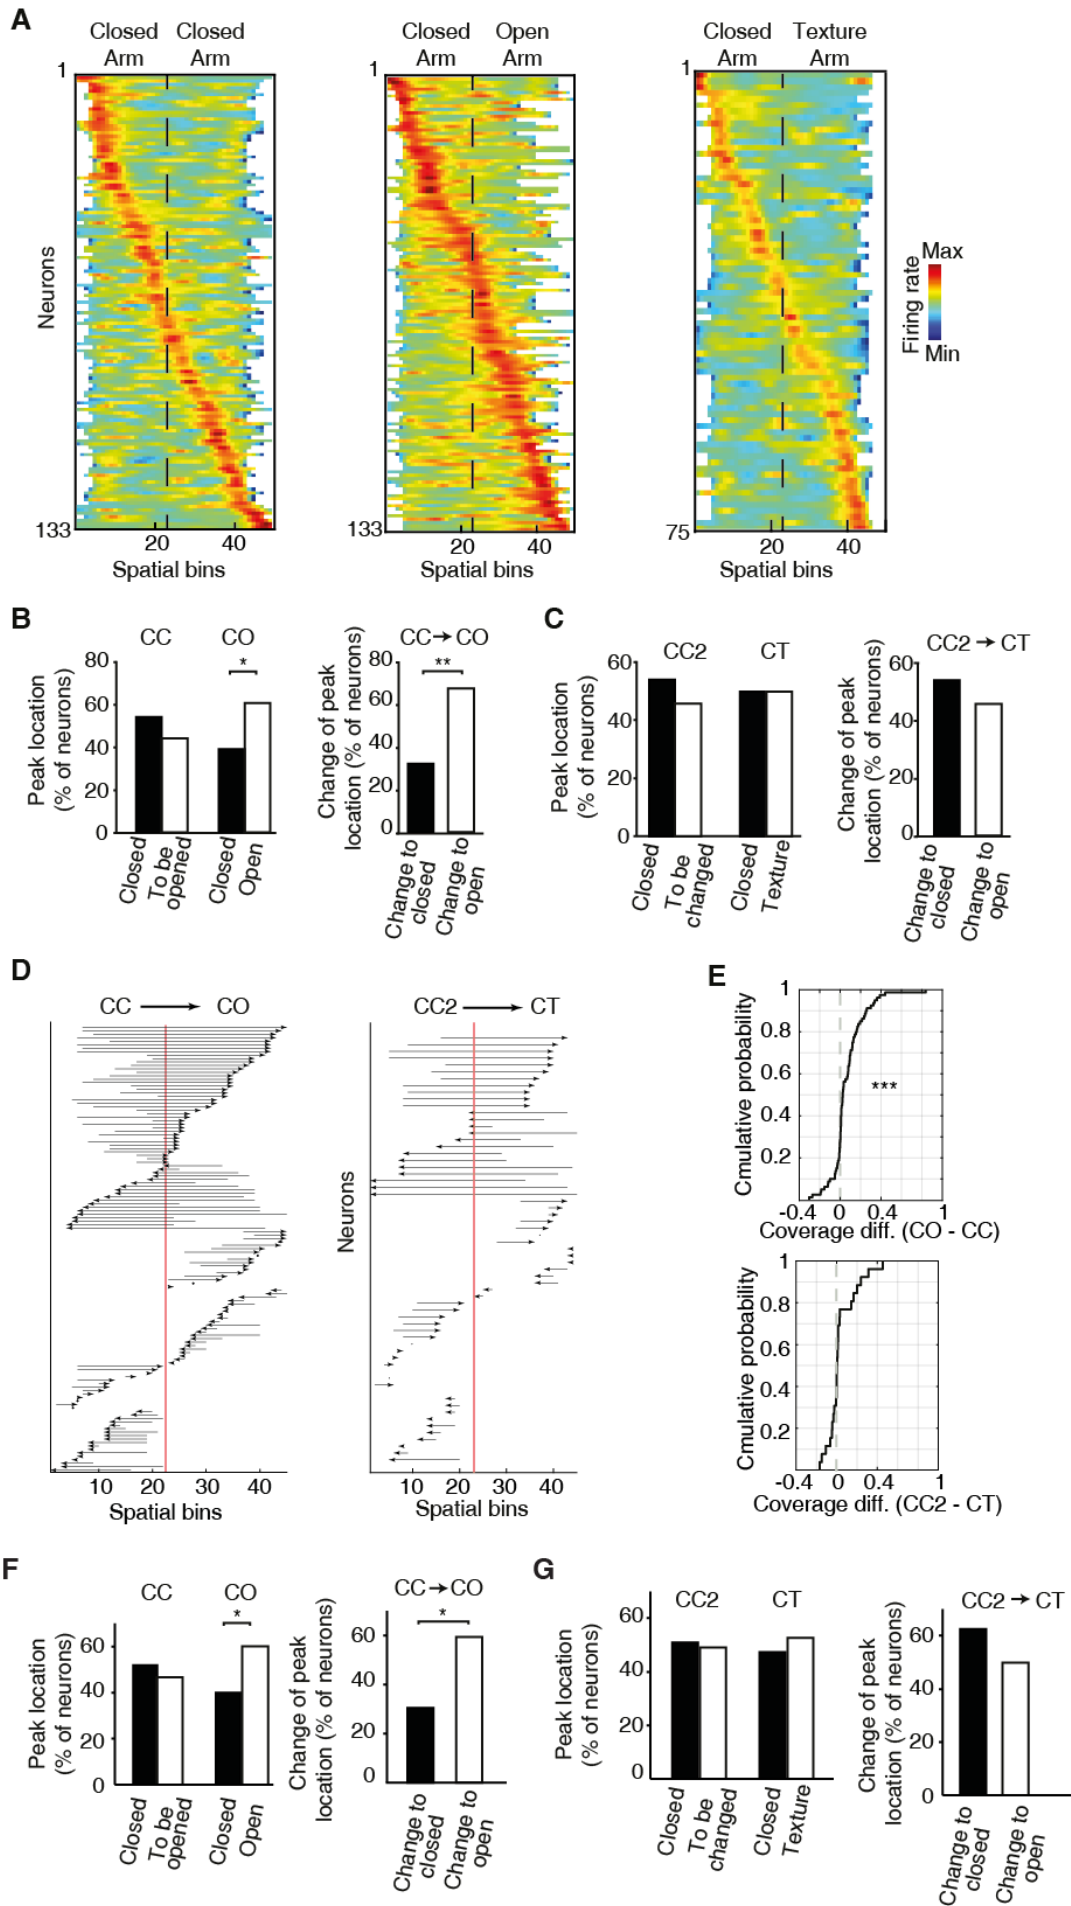

740 **Figure 3. Overrepresentation and remapping of ventral hippocampal activity during anxiety.**  
741 **(A).** Z-transformed firing rates (colour coded) of ventral hippocampal neurons during the exploration  
742 of the ELM and sorted by the spatial location of their peak firing activity for the three configurations:  
743 CC (left); CO (centre); CT (right). The order of neurons is sorted for each configuration independently.  
744 Dotted lines indicated the centre of the maze. Note the increased number of neurons with peak firing  
745 activity in the open arm. **(B).** Left, comparisons of the percentage of neurons with peak firing activity  
746 located in the different arms of the CC and CO configurations of ELM. Note the significant differences  
747 of the proportion of neurons with peak firing activity in the open arm ( $p = 0.0121$ , chi-squared test).  
748 Right, upon removal of the sidewalls, a larger proportion of neurons change the location of their peak  
749 firing activity from a previously closed to a currently opened arm ( $p = 0.0066$ , chi-square test). **(C).**  
750 Same analysis as in (B) for the CT configuration. CC2 is a configuration with sidewalls along the entire  
751 track (fully closed) explored right before the presentation of the CT configuration. No significant  
752 differences were found **(D).** Changes of the spatial location of the peak firing activity for individual  
753 neurons between different configurations. Each arrow denotes the remapping of the location of the  
754 peak firing activity between the CC (base of the arrow) and the CO configurations (arrowhead). The  
755 red line indicates the centre of the linear maze. Note that the peak activity of the neurons shifted  
756 towards the open arm when changing from the CC to CO configuration. **(E).** Comparison between the  
757 coverage index of the activity of single neurons (see methods) with peak firing located in the opened  
758 arm, recorded during ELM exploration. Top, the cumulative probability of the distribution generated  
759 by subtracting the coverage indexes of the CC configuration from the coverage indexes of the CO  
760 configuration. The plot indicates that the firing rate's coverage index of individual neurons significantly  
761 increased when the rat explored the CO configuration in comparison with the CC configuration ( $p =$   
762  $6.865e-05$ , Wilcoxon signed-rank). Bottom, same as left but without differences between the CC2 and  
763 CT configurations ( $p = 0.4237$ , Wilcoxon signed-rank). **(F).** Left, comparisons of the percentage of  
764 neurons with peak firing activity (after correction of the speed influence in the spiking activity by using  
765 the residuals of the GLM model) located in the different arms of the CC and CO configurations of ELM.  
766 ( $p = 0.019$ , chi-squared test). Right, upon removal of the sidewalls, a larger proportion of neurons  
767 change the location of their peak firing activity (after correction of the speed influence in the spiking  
768 activity) from a previously closed to a currently opened arm ( $p = 0.00176$ , chi-square test). **(G).** Same  
769 analysis as in (C) for the CT configuration. CC2 is a configuration with sidewalls along the entire track  
770 (fully closed) explored right before the presentation of the CT configuration. No significant differences  
771 were found.  
772

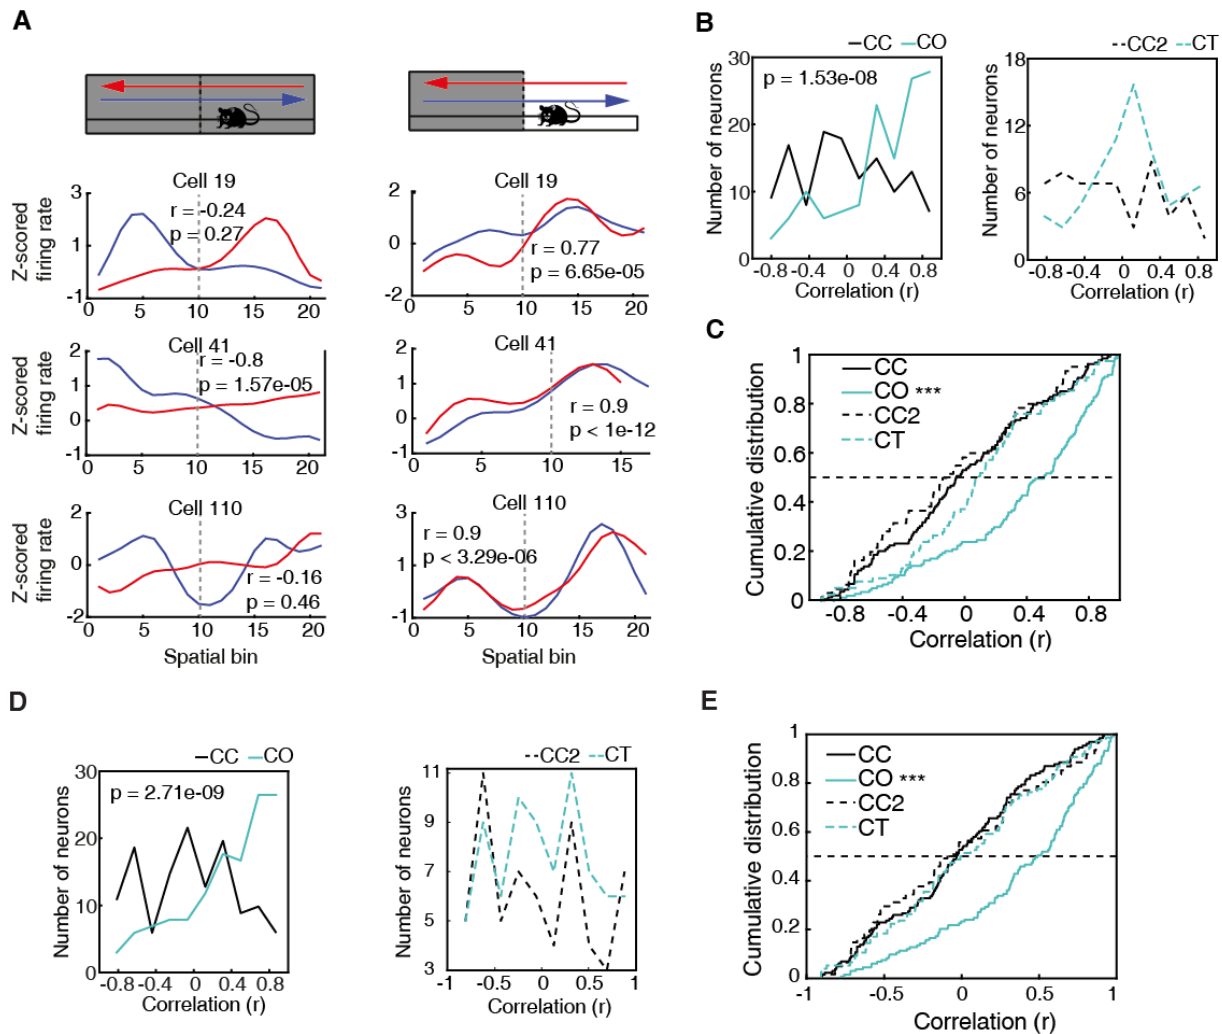

773

774 **Figure 4. The direction-dependent activity of vCA1 neurons is homogenised in an anxiogenic**  
 775 **location.**

776 **(A).** Neuronal activity of individual vH neurons while animals explored the ELM in both the CC and the  
 777 CO configuration. Blue lines denote when animals headed towards the arm that will be open (in the  
 778 case of the CC configuration) or is open (in the case of the CO configuration). Red lines denote when  
 779 animals returned from this arm. Correlation values (Spearman correlation) indicate the similarity  
 780 between the neuronal activities of both trajectories. **(B).** Histograms of the firing rate maps similarity  
 781 index (PFS, see methods) for the activities of single neurons calculated in the two possible directions  
 782 on the ELM (left to right and right to left). Left, PFS index is higher during the CO configuration (cyan)  
 783 compared to the CC (black) configuration ( $p = 1.536e-08$ , two-sample Kolmogorov-Smirnov test). Right,  
 784 PFS index is not significantly different during the CT configuration (dotted cyan) compared to the CC2  
 785 (dotted black) configuration ( $p = 0.0678$ , two sample Kolmogorov-Smirnov test) **(C).** Cumulative  
 786 distributions of the PFS indexes for the CC, CO, CT and CC2 configurations. Note that during the CO  
 787 configuration the PFS index of neurons is significantly higher compared to the other configurations (vs  
 788 CC,  $p = 1.536e-08$ ; vs CT,  $p = 8.1919e-07$  and vs CCT2  $p = 3.8183e-06$ ; two-sample Kolmogorov-Smirnov  
 789 test). **(D).** Histograms of the firing rate maps similarity index (PFS, see methods) for the activities of  
 790 single neurons (after correction of the speed influence in the spiking activity) calculated in the two  
 791 possible directions on the ELM (left to right and right to left). Left, PFS index is higher during the CO  
 792 configuration (cyan) compared to the CC (black) configuration ( $p = 2.7102e-09$ , two-sample  
 793 Kolmogorov-Smirnov test). Right, PFS index is not significantly different during the CT configuration

794 (dotted cyan) compared to the CC2 dotted black) configuration ( $p = 0.7448$ , two sample Kolmogorov-  
795 Smirnov test) (E). Cumulative distribution of the PFS indexes in D) for the CC, CO, CT and CC2  
796 configurations. Note that during the CO configuration the PFS index of neurons is significantly higher  
797 compared to the other configurations (vs CC,  $p = 2.7102e-09$ ; vs CT,  $p = 3.1228e-06$  and vs CC2  $p =$   
798  $9.1521e-06$ ; two-sample Kolmogorov-Smirnov test).

799

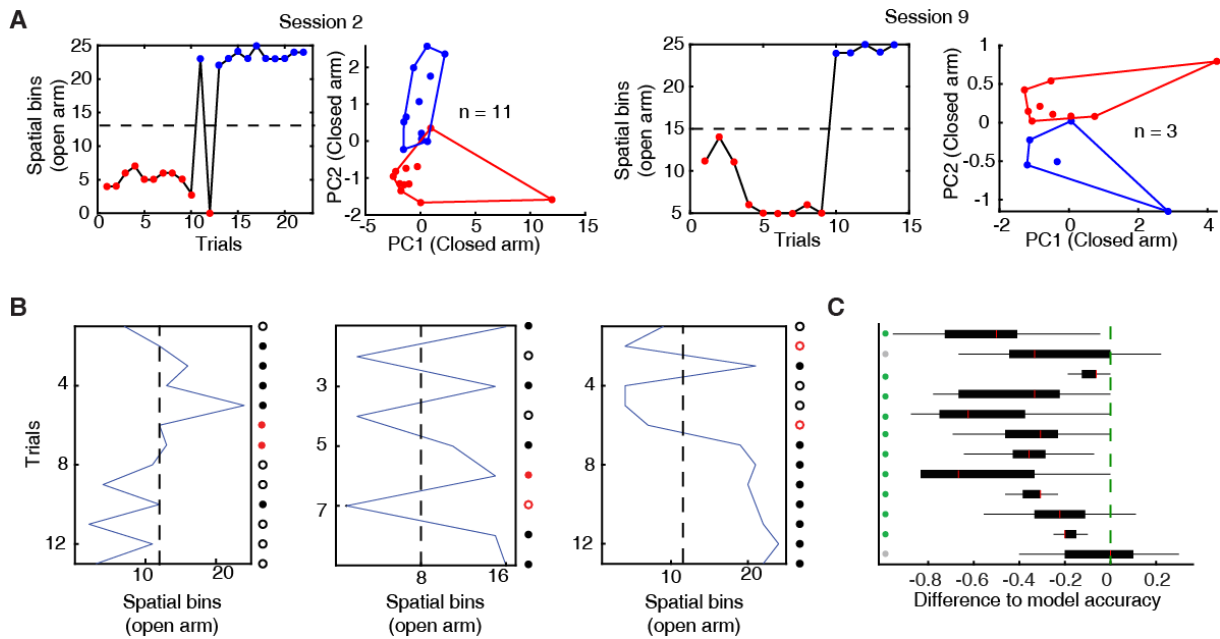

800

801 **Figure 5. The activity of ventral hippocampal neurons predicts the extent of exploration of an**  
 802 **anxiogenic location.**

803 (A). For two behavioural sessions, the furthest spatial bin visited on each trial (left) and the single-unit  
 804 activity of all co-recorded neurons during the run on the closed arm projected onto their two highest  
 805 principal components (right) are shown. The dotted line indicates the spatial bin set as a criterion to  
 806 define two different types of trajectories: proximal (red dots) and distal (blue dots) exploration. (B).  
 807 Predictions for three individual sessions. The blue line shows the furthest spatial bin reached during  
 808 specific trials. The dotted line indicates the middle of the exploration of the open arm and divides the  
 809 trials into proximal (left) and distal (right) explorations (used for the SVM-classifier). Dots at the right  
 810 of each plot show the trial by trial accuracy of the SVM-classifier (see methods). Full dots show trials  
 811 with distal explorations while circles show trials with proximal explorations. Red colour implies  
 812 inaccurate prediction of the SVM classifier. (C). Normalised distributions of the SVM-classifier  
 813 performance (observed data – shuffled data) for each of the 12 sessions used. The green line marks  
 814 the SVM-classifier performance on the observed data. Green dots show sessions for which the SVM-  
 815 classifier successfully predicted proximal or distal exploration (higher than the 95% percentile of the  
 816 shuffled data) based on neuronal firing activity during the exploration of the closed arms, while grey  
 817 dots show sessions with inaccurate prediction. Box plots show median, 25<sup>th</sup> and 75<sup>th</sup> percentile.
